# Supplementary material for: Evaluating L-band InSAR Snow Water Equivalent Retrievals with Repeat Ground-Penetrating Radar and Terrestrial Lidar Surveys in Northern Colorado
Source: Copernicus journal article supplement (doi:10.5194/egusphere-2024-236), 2024-02-05
Supplement: Supplementary file 1 [file egusphere-2024-236-supplement.pdf]

# Supplemental Material for: Evaluating L-band InSAR Snow Water Equivalent Retrievals with Repeat Ground-Penetrating Radar and Terrestrial Lidar Surveys in Northern Colorado

5 Randall Bonnell<sup>1</sup>, Daniel McGrath<sup>1</sup>, Jack Tarricone<sup>2,3</sup>, Hans-Peter Marshall<sup>4</sup>, Ella Bump<sup>5</sup>, Caroline Duncan<sup>6</sup>, Stephanie Kampf<sup>5</sup>, Yunling Lou<sup>7</sup>, Alex Olsen-Mikitowicz<sup>5</sup>, Megan Sears<sup>5</sup>, Keith Williams<sup>8</sup>, Lucas Zeller<sup>1</sup>, and Yang Zheng<sup>7</sup>

<sup>1</sup>Department of Geosciences, Colorado State University, Fort Collins, Colorado, USA

<sup>2</sup>Hydrological Sciences Laboratory, NASA Goddard Space Flight Center, Greenbelt, Maryland, USA

<sup>3</sup>NASA Postdoctoral Program, NASA Goddard Space Flight Center, Greenbelt, Maryland, USA

10 <sup>4</sup>Department of Geosciences, Boise State University, Boise, Idaho, USA

<sup>5</sup>Department of Ecosystem Science and Sustainability, Colorado State University, Fort Collins, Colorado, USA

<sup>6</sup>Alaska District, U.S. Army Corps of Engineers, Anchorage, Alaska, USA

<sup>7</sup>Jet Propulsion Laboratory, California Institute of Technology, Pasadena, California, USA

<sup>8</sup>GAGE Facility, UNAVCO Inc., Boulder, Colorado, USA

15 *Correspondence to:* Randall Bonnell (randall.bonnell@colostate.edu)

## *Contents:*

Tables S1–S4

Figures S1–3

Data Availability

20 References

25

30 **Supplementary Tables**

**Table S1:** Results from the test for atmospheric delays. Unwrapped phase ( $\varphi$ ) was regressed against signal path length for snow-free pixels. The slope estimate ( $\beta$ ) and coefficient of determination ( $r^2$ ) are reported for each date and polarization. RMSE was calculated with and without the estimated atmospheric corrections for four SNOTEL stations distributed throughout the UAVSAR flight line. Improvements in RMSE due to the atmospheric correction are reported as positive percents, while RMSE degradations are reported as a negative percent.

| InSAR Pair                          | HH                         |       |                       | HV                         |         |                       | VH                         |       |                       | VV                         |         |                       |
|-------------------------------------|----------------------------|-------|-----------------------|----------------------------|---------|-----------------------|----------------------------|-------|-----------------------|----------------------------|---------|-----------------------|
|                                     | $\beta$<br>( $\varphi/m$ ) | $r^2$ | RMSE<br>Change<br>(%) | $\beta$<br>( $\varphi/m$ ) | $r^2$   | RMSE<br>Change<br>(%) | $\beta$<br>( $\varphi/m$ ) | $r^2$ | RMSE<br>Change<br>(%) | $\beta$<br>( $\varphi/m$ ) | $r^2$   | RMSE<br>Change<br>(%) |
| <b>12–19 February 2020</b>          | 6.35e-5                    | 0.14  | -6.82                 | 7.85e-5                    | 0.22    | -40.74                | 8.21e-5                    | 0.21  | -11.43                | 7.76e-5                    | 0.29    | No Data               |
| <b>19–26 February 2020</b>          | -3.23e-5                   | 0.06  | 0.00                  | -3.08e-5                   | 0.05    | 0.00                  | -2.58e-5                   | 0.03  | 0.00                  | -2.97e-5                   | 0.06    | 0.00                  |
| <b>26 February – 12 March 2020</b>  | -9.24e-5                   | 0.15  | 13.70                 | -1.82e-5                   | 0.25    | No Data               | -1.34e-4                   | 0.20  | No Data               | -3.17e-5                   | 0.04    | No Data               |
| <b>15–20 January 2021</b>           | -3.60e-5                   | 0.08  | -2.99                 | -4.76e-5                   | 0.13    | -9.80                 | -5.38e-5                   | 0.16  | -12.24                | -3.99e-5                   | 0.11    | -2.44                 |
| <b>20–27 January 2021</b>           | 2.97e-5                    | 0.04  | 12.50                 | 4.45e-5                    | 0.09    | 3.70                  | 4.34e-5                    | 0.07  | 15.79                 | 2.65e-5                    | 0.04    | 16.67                 |
| <b>27 January – 3 February 2021</b> | -1.20e-4                   | 0.10  | 0.00                  | -1.16e-4                   | 0.09    | -3.23                 | -1.15e-4                   | 0.08  | -25.93                | -1.01e-4                   | 0.06    | 40.00                 |
| <b>3–23 February 2021</b>           | -2.41e-4                   | 0.58  | No Data               | No Data                    | No Data | No Data               | -2.57e-4                   | 0.63  | No Data               | No Data                    | No Data | No Data               |
| <b>23 February – 3 March 2021</b>   | 5.69e-5                    | 0.12  | 100.00                | 4.05e-5                    | 0.06    | 12.50                 | 6.56e-5                    | 0.11  | 32.00                 | 3.98e-5                    | 0.07    | -200.00               |
| <b>3–10 March 2021</b>              | -1.85e-4                   | 0.54  | -135.29               | -1.72e-4                   | 0.50    | 9.52                  | -1.84e-4                   | 0.52  | -312.50               | -1.70e-4                   | 0.53    | -75.00                |
| <b>16–22 March 2021</b>             | -2.12e-4                   | 0.22  | -37.50                | -2.64e-4                   | 0.25    | -140.00               | -2.52e-4                   | 0.28  | -16.67                | -2.40e-4                   | 0.25    | -300.00               |

**Table S2:** Weather Stations within the Rocky Mountains, Colorado UAVSAR flight line. Operators include the Colorado Avalanche Information Center (CAIC), Colorado State University (CSU), and the Natural Resources Conservation Service (NRCS). Location is given as WGS84 latitude and longitude in decimal degrees (DD). Elevation is estimated from the Copernicus 30 m digital elevation model. Vegetation and Canopy Cover details obtained from the Copernicus Global Land Cover 100 m dataset. Distance is given from the station to the Michigan River field site.

40

| Station Name                            | Abbreviation | Operator | Dates in Analysis                             | Location (DD)       | Elevation (m) | Vegetation and Canopy Cover | Distance (km) |
|-----------------------------------------|--------------|----------|-----------------------------------------------|---------------------|---------------|-----------------------------|---------------|
| Cameron Pass Weather Station            | CAIC         | CAIC     | 1 Jan to 31 Mar 2020,<br>1 Jan to 15 Mar 2021 | 40.497,<br>-105.9   | 3081          | Evergreen<br>>70%           | 2.5           |
| Cameron Peak Field Site Weather Station | CPWS         | CSU      | 14 Jan to 31 Mar 2021                         | 40.564,<br>-105.867 | 3012          | Severely Burned<br>0%       | 5.4           |
| Joe Wright SNOTEL                       | JW           | NRCS     | 1 Dec to 30 Apr 2020,<br>1 Dec to 30 Apr 2021 | 40.533,<br>-105.887 | 3100          | Evergreen<br>>70%           | 1.6           |
| Lake Irene SNOTEL                       | LI           | NRCS     | 1 Jan to 31 Mar 2020,<br>1 Jan to 31 Mar 2021 | 40.414,<br>-105.820 | 3254          | Evergreen<br>15–70%         | 13.1          |
| Montgomery Snow Stake                   | MSS          | CSU      | 1 Jan to 31 Mar 2021                          | 40.544,<br>-105.881 | 3067          | Evergreen<br>>70%           | 2.9           |
| Phantom Valley SNOTEL                   | PV           | NRCS     | 1 Jan to 31 Mar 2020,<br>1 Jan to 31 Mar 2021 | 40.398,<br>-105.846 | 2758          | Herbaceous<br>0%            | 13.9          |
| Willow Park SNOTEL                      | WP           | NRCS     | 1 Jan to 31 Mar 2020,<br>1 Jan to 31 Mar 2021 | 40.434,<br>-105.736 | 3263          | Evergreen<br>15–70%         | 16.2          |

45 **Table S3:** Field site SWE change ( $\Delta$ SWE) values for the interval board, GPR, and UAVSAR at co-located GPR pixels for the UAVSAR time series presented in the manuscript (all date intervals used HH polarization, except the VH polarization used for 3–23 February 2021).

| Date Interval                       | Interval Board Mean $\Delta$ SWE (mm) | GPR Median $\Delta$ SWE (mm) | UAVSAR Median $\Delta$ SWE (mm) |
|-------------------------------------|---------------------------------------|------------------------------|---------------------------------|
| <b>12–19 February 2020</b>          | 43                                    | 98                           | 97                              |
| <b>19–26 February 2020</b>          | 31                                    | 15                           | 16                              |
| <b>26 February – 12 March 2020</b>  | 21                                    | 10                           | 8                               |
| <b>15–20 January 2021</b>           | 22.5                                  | 13                           | 14                              |
| <b>20–27 January 2021</b>           | 27                                    | 30                           | 28                              |
| <b>27 January – 3 February 2021</b> | 4                                     | 0                            | -2                              |
| <b>3–23 February 2021</b>           | 73                                    | 112                          | 112                             |
| <b>23 February – 3 March 2021</b>   | 14                                    | 17                           | 16                              |
| <b>3–10 March 2021</b>              | 4                                     | 1                            | 4                               |
| <b>16–22 March 2021</b>             | 14                                    | 30                           | 34                              |

50 **Table S4:** Evaluation of the four polarizations (HH, HV, VH, and VV) of UAVSAR  $\Delta$ SWE retrievals using GPR  $\Delta$ SWE retrievals. For each polarization, the number of observations (n), the root mean squared error (RMSE), and Pearson’s correlation coefficient (r) are given. Instances where no data was available are indicated by hyphens.

| InSAR Pair                   | HH   |           |       | HV   |           |       | VH   |           |       | VV   |           |       |
|------------------------------|------|-----------|-------|------|-----------|-------|------|-----------|-------|------|-----------|-------|
|                              | n    | RMSE (mm) | r     |
| 12-19 February 2020          | 110  | 34        | -0.03 | 122  | 32        | -0.02 | 130  | 32        | -0.03 | -    | -         | -     |
| 19-26 February 2020          | 143  | 29        | 0.13  | 143  | 30        | 0.11  | 143  | 28        | 0.09  | 143  | 28        | 0.19  |
| 26 February - 12 March 2020  | 130  | 26        | 0.13  | 117  | 28        | 0.15  | 118  | 27        | 0.08  | 129  | 26        | 0.02  |
| 15-20 January 2021           | 390  | 19        | 0.13  | 401  | 20        | 0.16  | 379  | 20        | 0.18  | 400  | 17        | 0.08  |
| 20-27 January 2021           | 337  | 16        | 0.19  | 319  | 15        | 0.15  | 334  | 16        | 0.10  | 382  | 17        | 0.25  |
| 27 January - 3 February 2021 | 373  | 16        | 0.07  | 362  | 15        | 0.18  | 350  | 15        | 0.19  | 379  | 16        | 0.05  |
| 3-23 February 2021           | -    | -         | -     | -    | -         | -     | 185  | 33        | 0.01  | -    | -         | -     |
| 23 February - 3 March 2021   | 396  | 19        | 0.20  | 402  | 20        | 0.15  | 398  | 20        | 0.16  | 390  | 19        | 0.17  |
| 3-10 March 2021              | 362  | 23        | -0.24 | 364  | 21        | -0.15 | 357  | 21        | -0.16 | 376  | 19        | -0.18 |
| 16-22 March 2021             | 407  | 22        | 0.07  | 410  | 20        | 0.09  | 429  | 20        | 0.13  | 426  | 21        | 0.05  |
| Overall                      | 2648 | 21        | 0.66  | 2640 | 21        | 0.68  | 2823 | 22        | 0.80  | 2625 | 19        | 0.48  |

55 Supplementary Figures

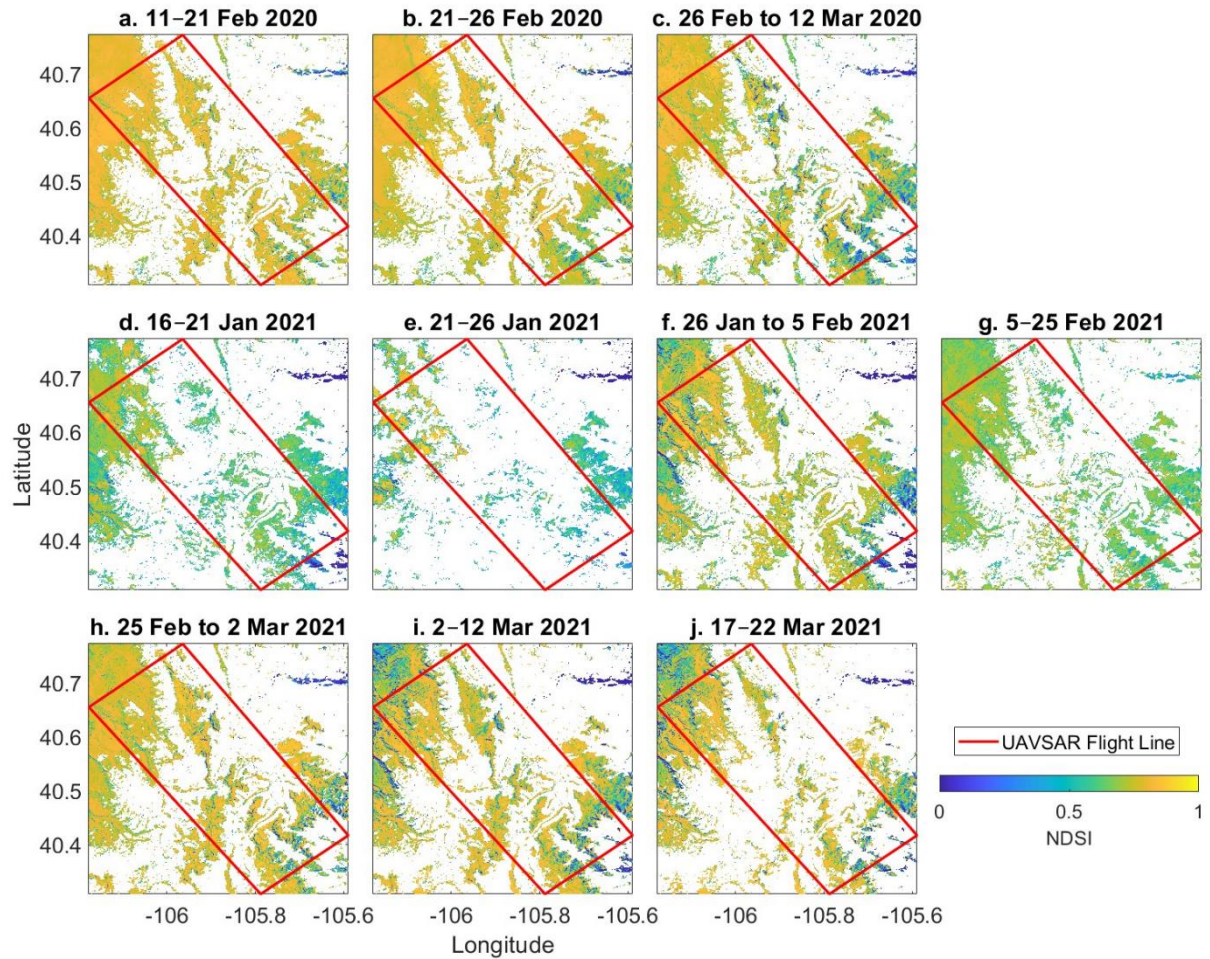

**Figure S1:** (a) NDSI (Equation A2) maps for each UAVSAR flight interval calculated from composited Sentinel-2 Level 2A imagery. Clouds and forests were removed from this analysis. Snow-free pixels were identified as  $\text{NDSI} < 0.20$ .

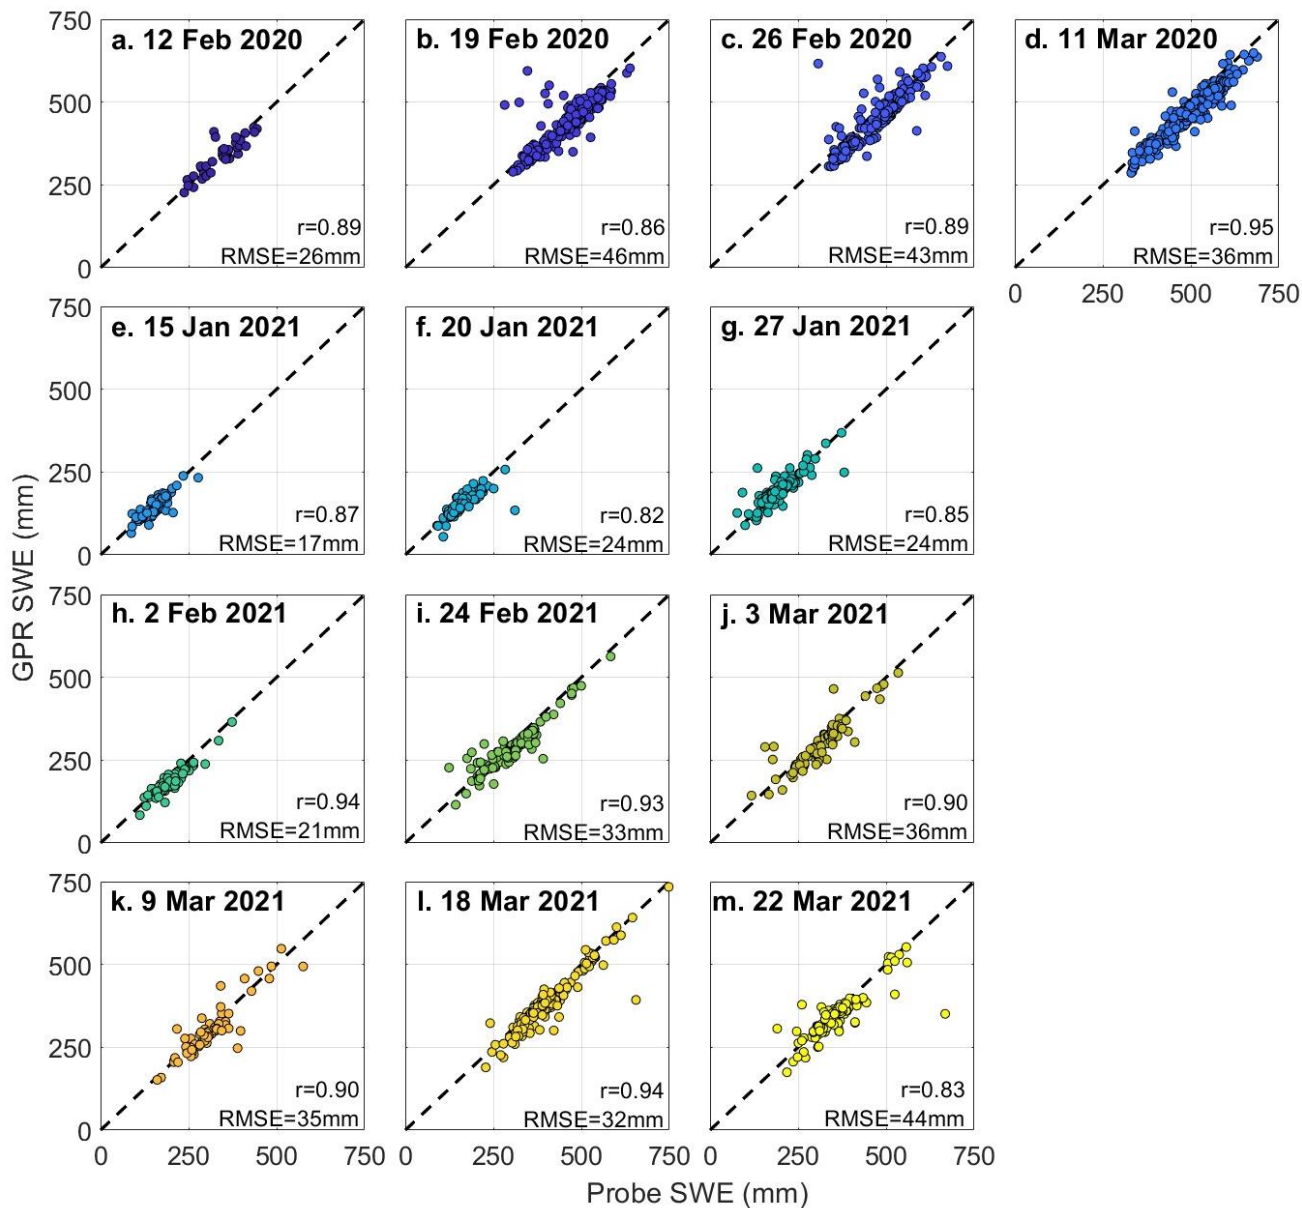

60 **Figure S2:** Comparison between GPR SWE retrievals and SWE converted from probed depths for each survey date. Median GPR SWE was calculated within a 1.5 m radius for each probed point. The number of GPR points used for estimating the median GPR SWE for comparison with probed SWE varied, but in most cases, exceeded 10 points per probe. Points are colored by date, following Figure 8a-c. In 2020, ~200 probed points were collected per survey date, whereas ~120 were collected per survey date in 2021. Overall Pearson's correlation coefficient = 0.97 and RMSE = 35 mm.

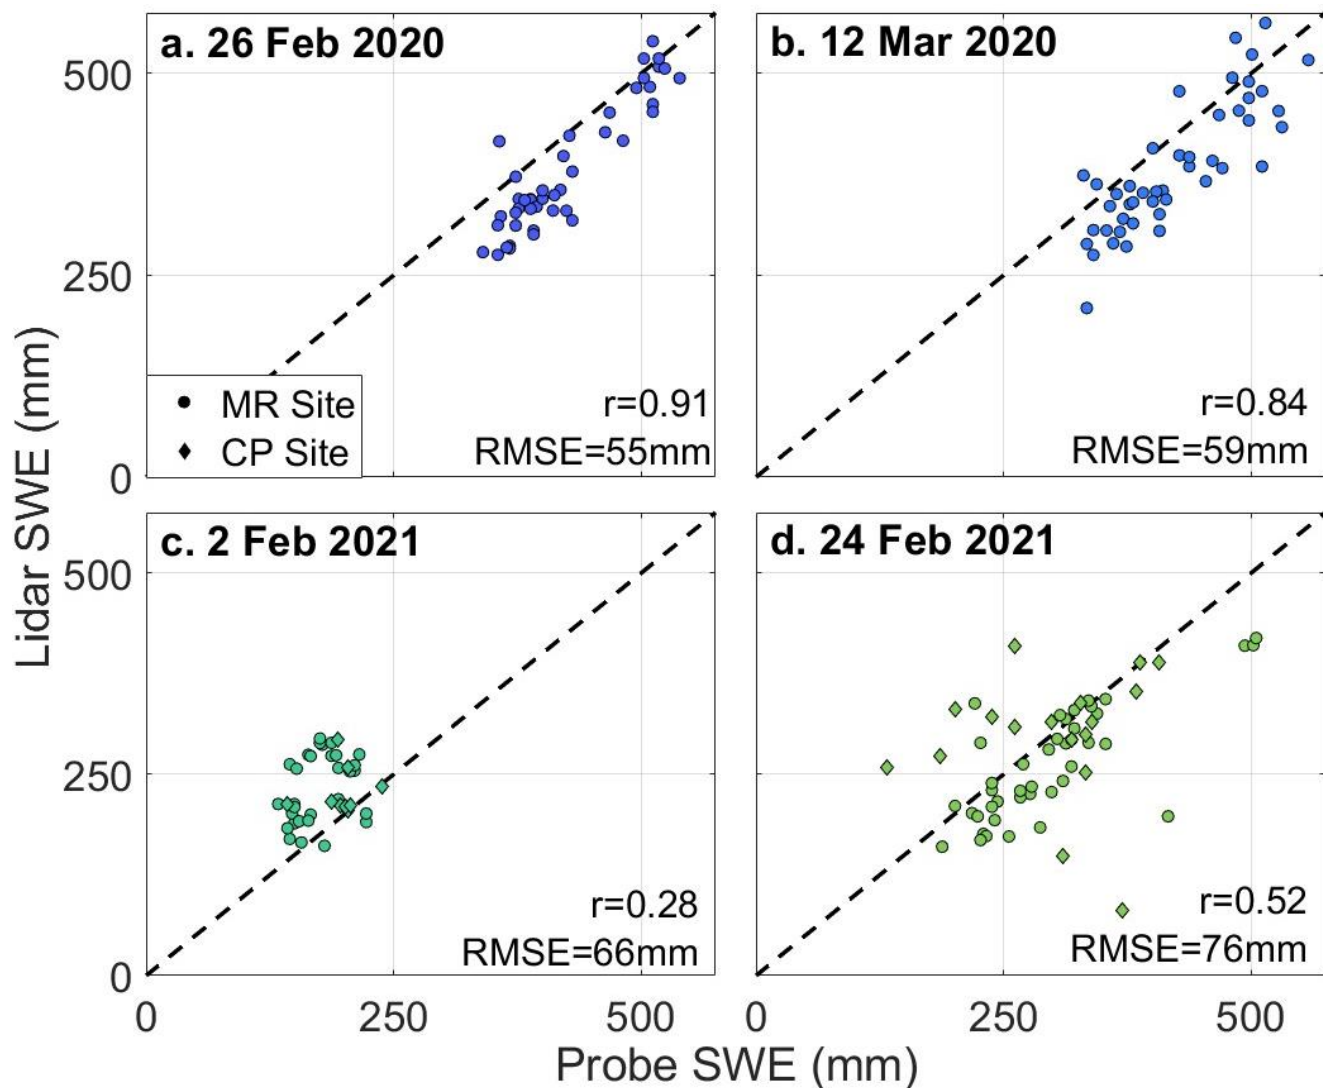

**Figure S3:** Comparisons between TLS SWE retrievals and SWE converted from probed depths for each lidar survey date. Probed SWE points represent the average of the one to two probed points within a single TLS pixel. The TLS survey conducted on 10 February 2021 was adjusted to 2 February 2021 by using SWE measured on the interval board on 10 February 2021. Overall Pearson's correlation coefficient = 0.83 and RMSE = 66mm. Points are colored by date, following Figure 8a–c.

### Data Availability

GPR datasets used in this analysis are archived with the NSIDC (Bonnell et al., 2022; McGrath et al., 2021). Probed snow depths from both seasons are under review at the NSIDC. SNOTEL station data is publicly available from the NRCS and was used for the following stations: Joe Wright (<https://wcc.sc.gov.usda.gov/nwcc/site?sitenum=551>), Lake Irene

75 (<https://wcc.sc.egov.usda.gov/nwcc/site?sitenum=565>), Willow Park (<https://wcc.sc.egov.usda.gov/nwcc/site?sitenum=870>), and Phantom Valley (<https://wcc.sc.egov.usda.gov/nwcc/site?sitenum=688>). TLS point clouds are available at UNAVCO Inc. (Williams, 2021). NASA UAVSAR datasets are available from UAVSAR or the ASF DAAC, including InSAR pair products (i.e., unwrapped phase, coherence) and SLC products (i.e., look vectors; NASA UAVSAR, 2020; NASA UAVSAR, 2021). The Copernicus 30 m DEM, Copernicus Global 100 m Land Cover Dataset, and Sentinel-2 Level 2A imagery were accessed via Google Earth Engine (Gorelick et al., 2017).

## 80 **References**

Bonnell, R., McGrath, D., Zeller, L., Bump, E., and Olsen-Mikitowicz, A.: SnowEx21 Cameron Pass Ground Penetrating Radar, Version 1, National Snow and Ice Data Center Distributed Active Archive Center [Data Set], <https://doi.org/10.5067/SRWGLYCB6ZC4>, 2022.

85 Buchhorn, M., Smets, B., Bertels, L., Roo, B. D., Lesiv, M., Tsendbazar, N.-E., Herold, M., and Fritz, S.: Copernicus Global Land Service: Land Cover 100m: collection 3: epoch 2019: Globe (Version V3.0.1), Zenodo [data set], <https://doi.org/10.5281/zenodo.393050>, 2020.

European Space Agency: Copernicus Global Digital Elevation Model, Distributed by Google Earth Engine [data set], <https://doi.org/10.5270/ESA-c5d3d65>, 2021.

90 European Space Agency: Copernicus Sentinel data, Distributed by Google Earth Engine [data set], [https://doi.org/10.5270/S2\\_-6eb6imz](https://doi.org/10.5270/S2_-6eb6imz), 2022.

Kampf, S., Sears, M., Miller, Q., Puntteney-Desmond, K., Barnard, D., Green, T., Erskine, R., Sitterson, J., Kiewiet, L., Reis, W., and McGrath, D.: Cameron Peak Fire stream and weather data WY2021, HydroShare [data Set], <http://www.hydroshare.org/resource/a15f503ab00b4980a4bfbe7e8552f9a3>, 2022.

95 McGrath, D., Bonnell, R., Olsen-Mikitowicz, A., Duncan, C., and Grabowski, J.: SnowEx20 Cameron Pass Ground Penetrating Radar, Version 1, NASA National Snow and Ice Data Center Distributed Active Archive Center [data set], <https://doi.org/10.5067/U4Q3X27BMRR4>, 2021.

NASA UAVSAR: Rocky Mountains, Colorado Flight Line, Alaska Satellite Facility Distributed Active Archive Center [data set], 2020.

100 NASA UAVSAR: Rocky Mountains, Colorado Flight Line, Alaska Satellite Facility Distributed Active Archive Center [data set], 2021.

Williams, K.: Cameron Pass NASA SnowEx, UNAVCO Inc. [data set], <https://tls.unavco.org/projects/U-077/>, 2021.
